# Supplementary material
Source: PubMed Central journal article supplement (PMC8748274)
Supplement: NIHMS1731109-supplement-1.pdf [file NIHMS1731109-supplement-1.pdf]

Supplementary Table 1. Genes included on targeted panels by laboratory

| Laboratory          | Panel description  | No. of genes included | Disorders*                                                                                                   | Genes                                                                                                                                                                                                                                                                                                                                                                                                                                                                                                                                                                                                  |
|---------------------|--------------------|-----------------------|--------------------------------------------------------------------------------------------------------------|--------------------------------------------------------------------------------------------------------------------------------------------------------------------------------------------------------------------------------------------------------------------------------------------------------------------------------------------------------------------------------------------------------------------------------------------------------------------------------------------------------------------------------------------------------------------------------------------------------|
| <b>Laboratory 1</b> | Non-immune hydrops | 87                    | RASopathies, skeletal dysplasias, metabolic disorders, arthrogryposes, multiple congenital anomaly syndromes | ALG1, ALG9, ASAH1, BRAF, CANT1, CBL, CCBE1, CDAN1, CHRNA1, CHRND, CHRNG, CLCNKA, CLCNKB, COL2A1, CTSA, DHCR7, FAT4, FGFR3, FOXC2, FOXP3, G6PD, GALNS, GATA1, GBA, GBE1, GLA, GLB1, GNPTAB, GUSB, HADHA, HADHB, HRAS, IDUA, KAT6B, KIAA0586, KIF23, KLF1, KMT2D, KRAS, LBR, LIPA, LZTR1, MAP2K1, MAP2K2, MID1, MVK, NEU1, NPC1, NRAS, PEX1, PEX10, PEX12, PEX13, PEX14, PEX16, PEX19, PEX26, PEX3, PEX5, PEX6, PIEZO1, PIGA, PKLR, PMM2, PTH1R, PTPN11, RAF1, RASA1, RIT1, RPL11, RPL35A, RPL5, RPS10, RPS17, RPS19, RPS24, RPS26, SEC23B, SHOC2, SLC17A5, SMPD1, SOS1, SOS2, SOX18, SUMF1, UROS, WDR35 |
|                     | RASopathy          | 23                    | RASopathies                                                                                                  | A2ML1, BRAF, CABIN1, CBL, HRAS, KAT6B, KRAS, LZTR1, MAP2K1, MAP2K2, NF1, NF2, NRAS, NSUN2, PTPN11, RAF1, RASA2, RIT1, RRAS, SHOC2, SOS1, SOS2, SPRED1                                                                                                                                                                                                                                                                                                                                                                                                                                                  |
| <b>Laboratory 2</b> | Fetal hydrops      | 66                    | RASopathies                                                                                                  | AHCY, ALG1, ASAH1, BRAF, CBL, CCBE1, CTSA, DHCR7, EBP, FH, FLT4, FOXC2, FOXP3, GALNS, GBA, GBE1, GLA, GLB1, GLE1, GNPTAB, GUSB, HADHA, HBA1, HBA2, HBZ, HRAS, IDUA, KLF1, KRAS, LARS2, LBR, LIPA, LZTR1, MAP2K1, MAP2K2, NEU1, NPC1, NRAS, PEX1, PEX10, PEX11B, PEX12, PEX13, PEX14, PEX16, PEX19, PEX2, PEX26, PEX3, PEX5, PEX6, PEX7, PIEZO1, PMM2, PTPN11, RAF1, RIT1, SGPL1, SHOC2, SLC17A5, SMPD1, SOS1, SOS2, SUMF1, TALDO1,                                                                                                                                                                     |

|                     |                    |     |                                                                                                                                  |                                                                                                                                                                                                                                                                                                                                                                                                                                                                                                                                                                                                                                                                                                                                                                                                                                                                                                                                                                                                                              |
|---------------------|--------------------|-----|----------------------------------------------------------------------------------------------------------------------------------|------------------------------------------------------------------------------------------------------------------------------------------------------------------------------------------------------------------------------------------------------------------------------------------------------------------------------------------------------------------------------------------------------------------------------------------------------------------------------------------------------------------------------------------------------------------------------------------------------------------------------------------------------------------------------------------------------------------------------------------------------------------------------------------------------------------------------------------------------------------------------------------------------------------------------------------------------------------------------------------------------------------------------|
|                     | RASopathy          | 19  | RASopathies                                                                                                                      | UROS<br>A2ML1, BRAF, CBL, HRAS, KRAS, LZTR1, MAP2K1, MAP2K2, NF1, NRAS, PPP1CB, PTPN11, RAF1, RASA2, RIT1, SHOC2, SOS1, SOS2, SPRED1                                                                                                                                                                                                                                                                                                                                                                                                                                                                                                                                                                                                                                                                                                                                                                                                                                                                                         |
| <b>Laboratory 3</b> | Non-immune hydrops | 148 | RASopathies, skeletal dysplasias, metabolic disorders, congenital anemias, arthrogryposes, multiple congenital anomaly syndromes | ACAD9, ADAMTS3, AHCY, ALG1, ALG12, ALG8, ALG9, ALPK3, ASAH1, BRAF, BSND, CANT1, CBL, CCBE1, CDAN1, CELSR1, CEP55, CHD7, CHRNA1, CHRND, CHRNG, COG6, COL2A1, CTSA, DHCR24, DHCR7, DNAH9, EBP, ENPP1, EPHB4, FAT4, FGFR3, FIG4, FLT4, FOXC2, FOXP3, FRAS1, FREM2, G6PD, GAA, GALC, GALNS, GATA1, GBA, GBE1, GLA, GLB1, GLUL, GNPTAB, GRIP1, GUSB, HADH, HADHA, HADHB, HBA1, HBA2, HRAS, IDUA, KAT6B, KCNJ1, KCNJ2, KDM6A, KIAA0586, KIF23, KLF1, KLHL40, KMT2D, KRAS, LBR, LIPA, LZTR1, MAP2K1, MAP2K2, MGAT2, MID1, MVK, MYH3, MYOM1, MYRF, NEB, NEK1, NEU1, NEXN, NPC1, NPC2, NRAS, PEX1, PEX10, PEX12, PEX13, PEX14, PEX16, PEX19, PEX2, PEX26, PEX3, PEX5, PEX6, PEX7, PHGDH, PEIZO1, PIGA, PKLR, PMM2, PSAT1, PTH1R, PTPN11, RAF1, RASA1, RIT1, RPL11, RPL15, RPL27, RPL35A, RPL5, RPS10, RPS17, RPS19, RPS24, RPS26, RPS27, RPS29, RPS7, RYR1, SCN5A, SEC23B, SF3B4, SGPL1, SHOC2, SLC12A1, SLC17A5, SLC22A5, SLC26A2, SMPD1, SOS1, SOS2, SOX18, STAT3, SUMF1, SUZ12, TALDO1, TAPT1, TAZ, TRIP11, UROS, WAC, WDR35, ZEB2 |
|                     | RASopathy          | 20  | RASopathies                                                                                                                      | A2ML1, BRAF, CBL, HRAS, KRAS, LZTR1, MAP2K1, MAP2K2, MAP3K8, NF1, NRAS, PTPN11, RAF1, RASA2, RIT1, RRAS, SHOC2, SOS1, SOS2, SPRY1                                                                                                                                                                                                                                                                                                                                                                                                                                                                                                                                                                                                                                                                                                                                                                                                                                                                                            |
| <b>Laboratory 4</b> | Metabolic non-     | 51  | Metabolic disorders only; cases not                                                                                              | AHCY, ALG1, ALG12, ALG8, ALG9, ARSB, ASAH1, CTSA, DHCR7, G6PD, GAA, GALC, GALNS, GBE1, GLB1,                                                                                                                                                                                                                                                                                                                                                                                                                                                                                                                                                                                                                                                                                                                                                                                                                                                                                                                                 |

|                     |                                    |    |                               |                                                                                                                                                                                                                                                |
|---------------------|------------------------------------|----|-------------------------------|------------------------------------------------------------------------------------------------------------------------------------------------------------------------------------------------------------------------------------------------|
|                     | immune fetal hydrops               |    | associated with malformations | GLUL, GNPTAB, GUSB, HADH, HADHA, HADHB, IDUA, LIPA, MVK, NEU1, NPC1, NPC2, PEX1, PEX10, PEX12, PEX13, PEX14, PEX16, PEX19, PEX2, PEX26, PEX3, PEX5, PEX6, PEX7, PHGDH, PIGA, PMM2, PSAT1, SLC17A5, SLC22A5, SLC26A2, SMPD1, SUMF1, TAZ, TRIP11 |
| <b>Laboratory 5</b> | Prenatal Noonan syndrome           | 19 | RASopathies                   | A2ML1, BRAF, CBL, HRAS, KRAS, LZTR1, MAP2K1, MAP2K2, MRAS, NRAS, PTPN11, RAF1, RASA2, RIT1, RRAS, SHOC2, SOS1, SOS2, SPRED1                                                                                                                    |
| <b>Laboratory 6</b> | Prenatal Noonan spectrum disorders | 11 | RASopathies                   | BRAF, HRAS, KRAS, MAP2K1, MAP2K2, NRAS, PTPN11, RAF1, RIT1, SHOC2, SOS1                                                                                                                                                                        |
| <b>Laboratory 7</b> | Noonan spectrum disorders          | 16 | RASopathies                   | BRAF, CBL, HRAS, KRAS, LZTR1, MAP2K1, MAP2K2, NRAS, PTPN11, RAF1, RASA2, RIT1, SHOC2, SOS1, SOS2, SPRED1                                                                                                                                       |

\*Disorders covered as described on laboratory website.
